# Supplementary material for: Genome wide association in Spanish bread wheat landraces identifies six key genomic regions that constitute potential targets for improving grain yield related traits
Source: PubMed Central journal article supplement (PMC10643358; doi:10.1007/s00122-023-04492-x), 2023-11-13
Supplement: 122_2023_4492_MOESM5_ESM.pdf [file 122_2023_4492_MOESM5_ESM.pdf]

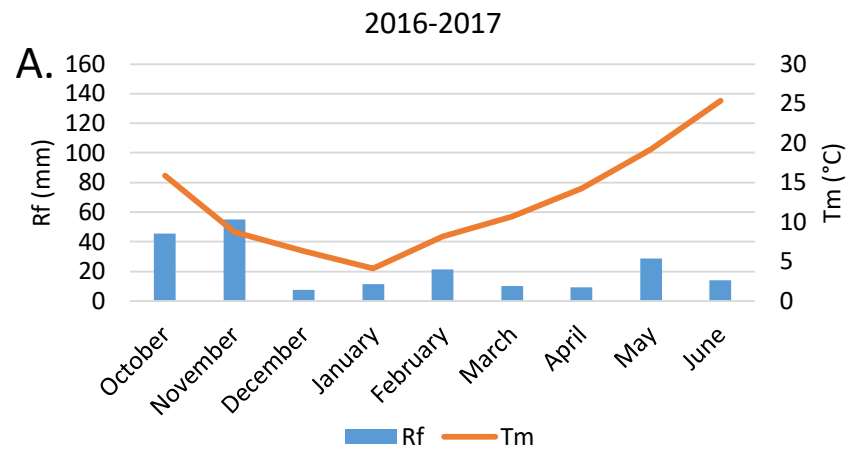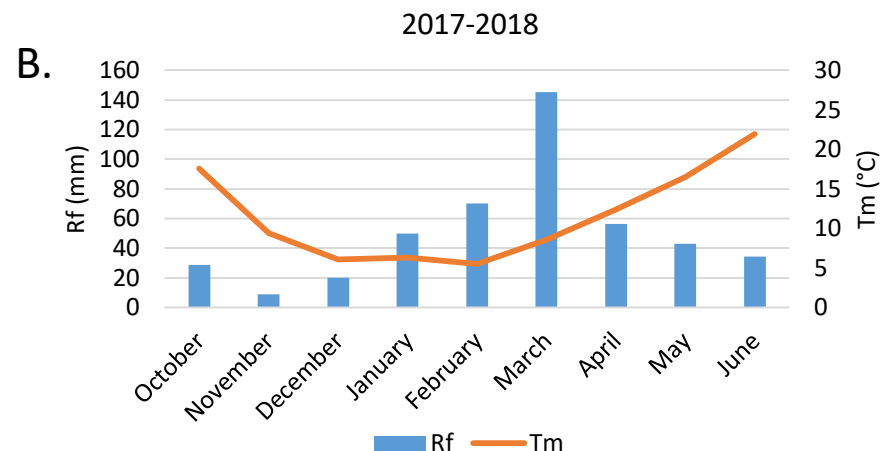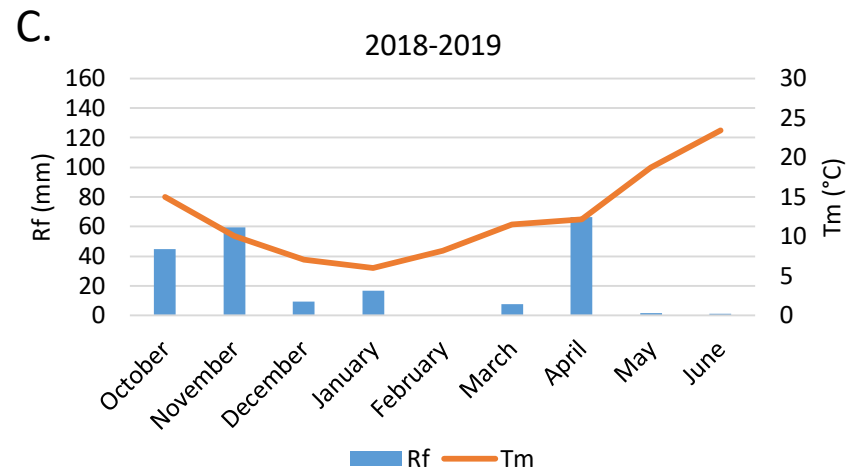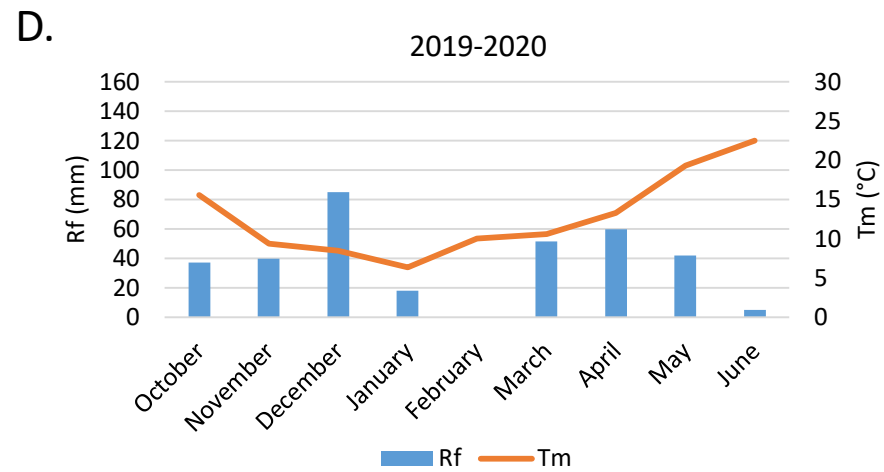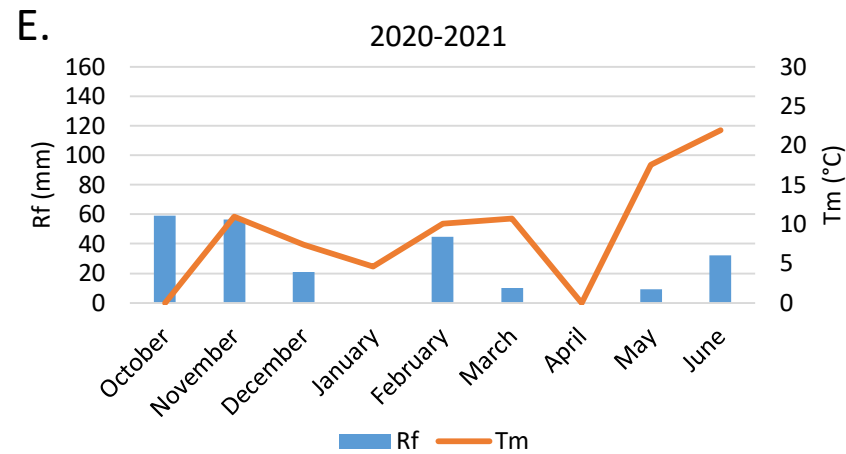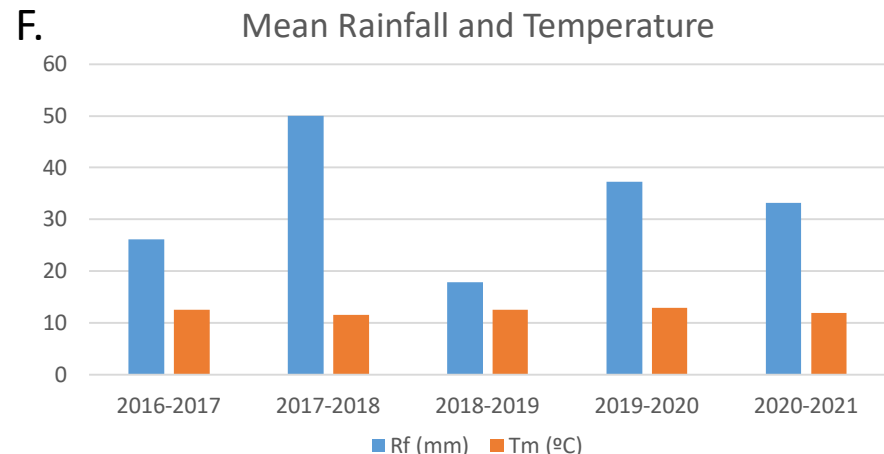

**Fig. S1. Summary of climatic data during the phenotypic trials.** Monthly rainfall (Rf, mm) in orange, and mean temperature (Tm, °C) blue, recorded from October to July at the field trial sites during (A) 2016–2017, (B) 2017–2018, (C) 2018–2019, (D) 2019–2020 and (E) 2020–2021, and (F) mean temperature (Tm, °C) and rainfall (Rf, mm) per season, both values indicated in the same axis.
