# Supplementary material for: Genome wide association in Spanish bread wheat landraces identifies six key genomic regions that constitute potential targets for improving grain yield related traits
Source: PubMed Central journal article supplement (PMC10643358; doi:10.1007/s00122-023-04492-x), 2023-11-13
Supplement: 122_2023_4492_MOESM6_ESM.pdf [file 122_2023_4492_MOESM6_ESM.pdf]

A

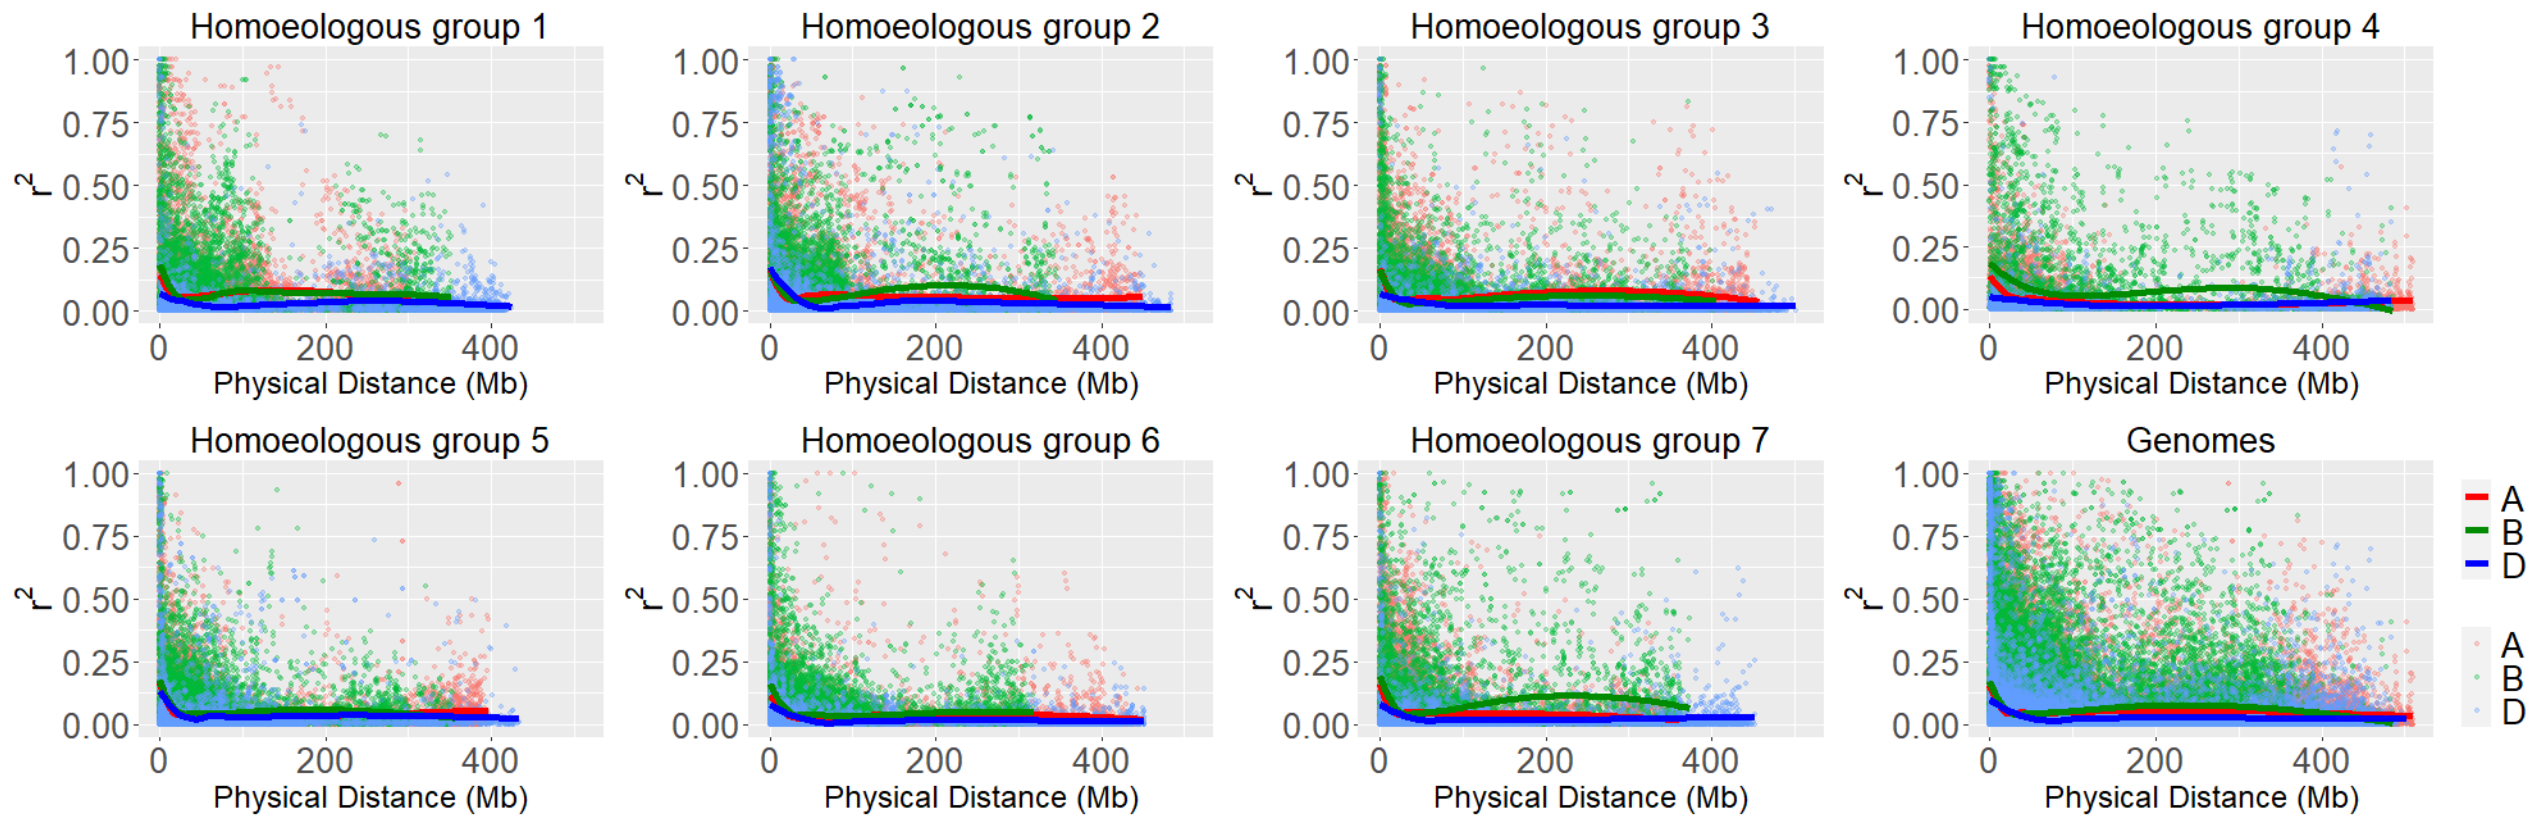

**Fig. S2. LD ( $r^2$ ) decay.** (A) along the chromosomes and full genome. Genome A in red, B in green and D in blue. (B) LD ( $r^2$ ) decay indicating half LD decay and half LD decay distance in the full genome.

B

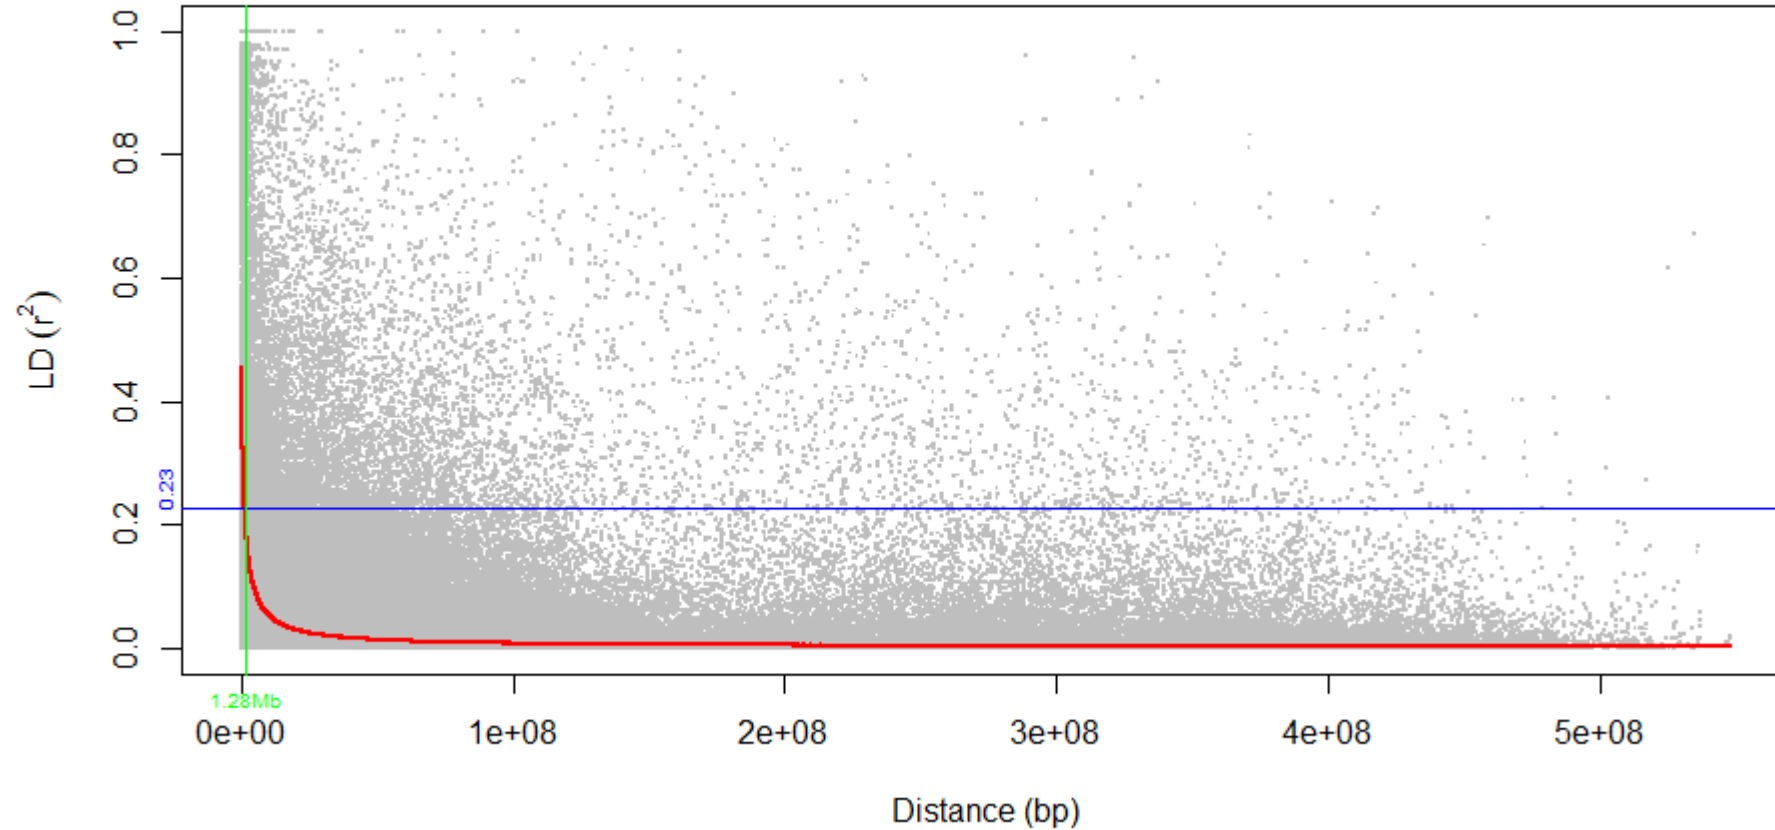

**Fig. S2. LD (r<sup>2</sup>) decay.** (A) along the chromosomes and full genome. Genome A in red, B in green and D in blue. (B) LD (r<sup>2</sup>) decay indicating half LD decay (blue) and half LD decay distance (green) in the full genome.
