# Supplementary material for: Genome wide association in Spanish bread wheat landraces identifies six key genomic regions that constitute potential targets for improving grain yield related traits
Source: PubMed Central journal article supplement (PMC10643358; doi:10.1007/s00122-023-04492-x), 2023-11-13
Supplement: 122_2023_4492_MOESM7_ESM.pdf [file 122_2023_4492_MOESM7_ESM.pdf]

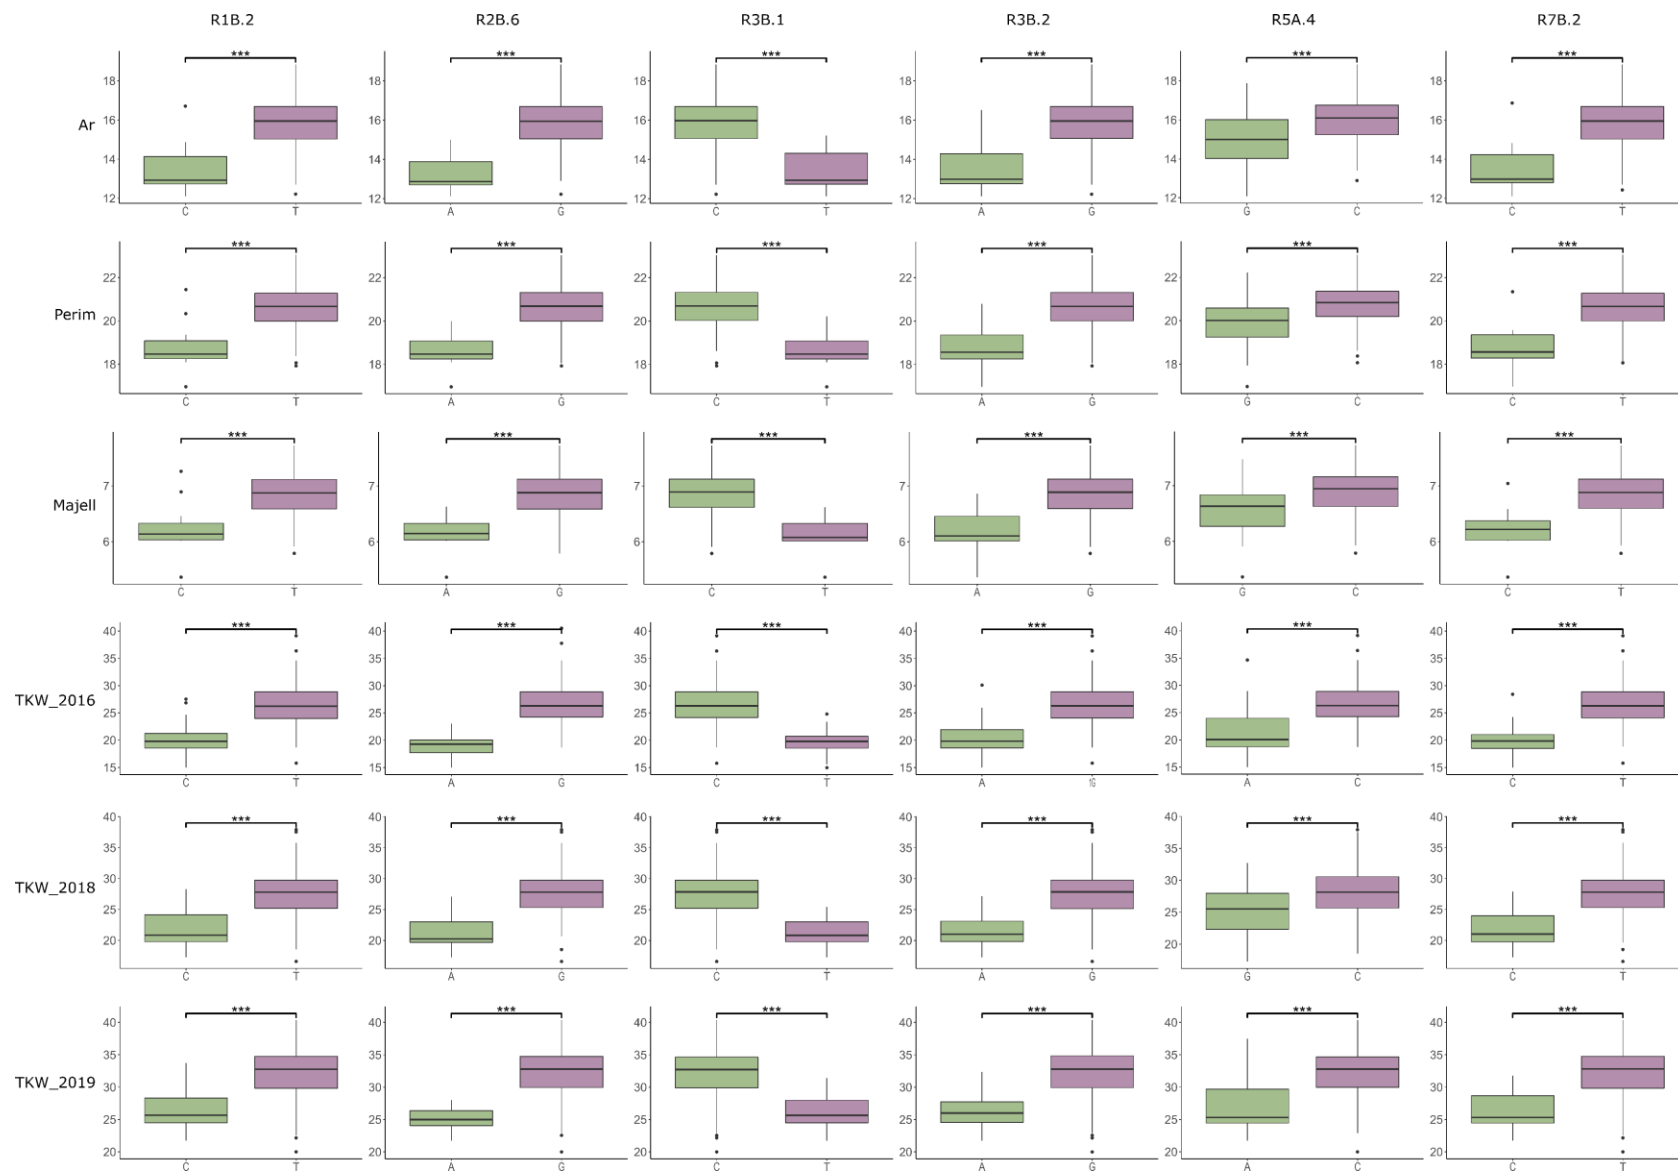

**Fig. S3. Average trait value according to the allele carried by the accessions in the most significant MTA inside the six selected genomic regions. Area: Ar; Perimeter: Perim; Major Ellipse: Majell; Thousand Kernel Weight: TKW. \*\*\* represented a  $p$ -value < 0,001.**
