# Supplementary material for: Genome wide association in Spanish bread wheat landraces identifies six key genomic regions that constitute potential targets for improving grain yield related traits
Source: PubMed Central journal article supplement (PMC10643358; doi:10.1007/s00122-023-04492-x), 2023-11-13
Supplement: 122_2023_4492_MOESM8_ESM.pdf [file 122_2023_4492_MOESM8_ESM.pdf]

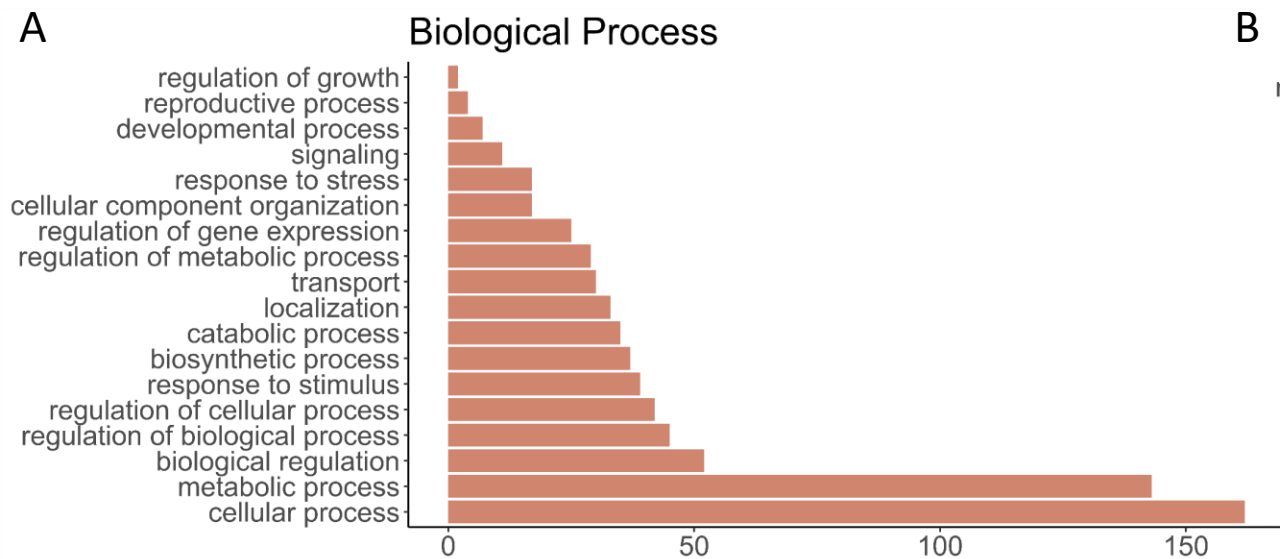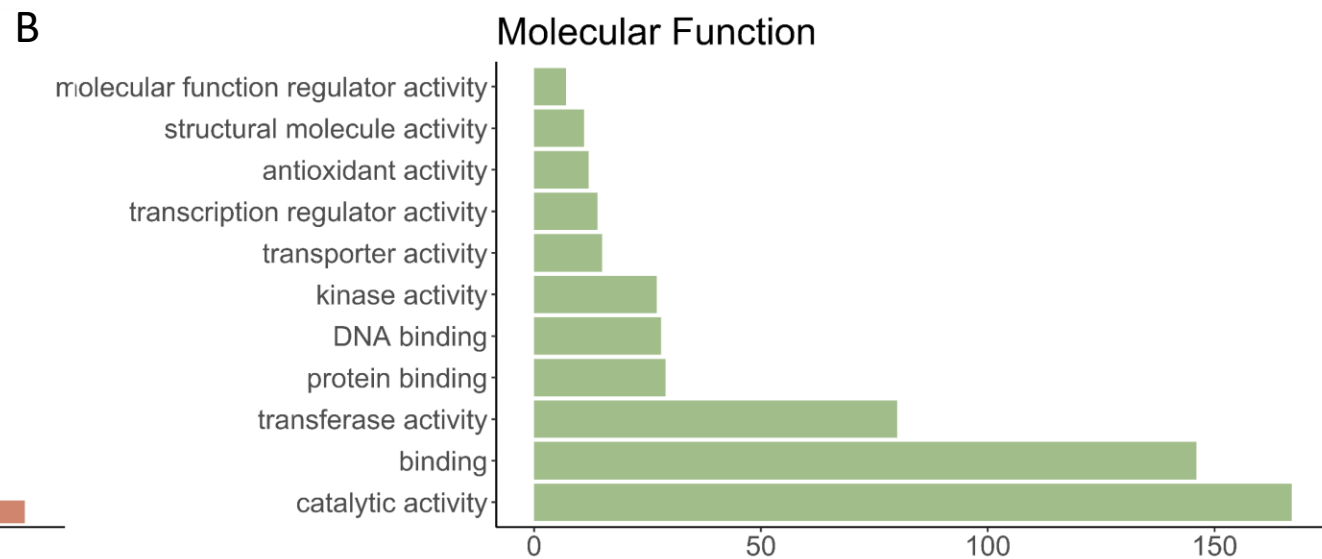

**Fig. S4. Gene Ontology classification of genes within the selected regions. (A) Biological Process. (B) Molecular Function.**
